# Supplementary material for: Prognostic Nomogram and a Risk Classification System for Predicting Overall Survival of Elderly Patients with Fibrosarcoma: A Population-Based Study
Source: J Oncol. 2021 Sep 18;2021:9984217. doi: 10.1155/2021/9984217 (PMC8476268; doi:10.1155/2021/9984217)
Supplement: Supplementary Materials — Table 1: baseline demographics and clinical characteristics of elderly patients with fibrosarcoma. Table 2: univariate and multivariate Cox regression analyses of elderly patients with fibrosarcoma. [file 9984217.f1.zip]

Archive with 2 entries (2 files):
- 9984217.f1/Table 1.docx
- 9984217.f1/Table 2.docx
